# Supplementary material
Source: HighWire-hosted journal article supplement (https://oem.bmj.com/content/79/9/602)
Supplement: inline-supplementary-material-1 [file inline-supplementary-material-1.pdf]

Supplementary Appendix 1. Stata code and calculations used to obtain model-based:

- 1) Age-adjusted Annual Percentage Change in Table 2: Using 'Overall' as an example
- 2) Predicted Age-industry adjusted rates in Figure 1

Input variables:

|               |                                                                                                                                                                                                                                                                        |
|---------------|------------------------------------------------------------------------------------------------------------------------------------------------------------------------------------------------------------------------------------------------------------------------|
| num           | numerator, i.e number of deaths of interest in each strata                                                                                                                                                                                                             |
| x2            | allows for change in slope corresponding to the first legislative change. Coded 0 for 1984-1992, 1 for 1993, 2 for 1994, ..., 22 for 2014. If the x2 coefficient is negative, the first legislative change is having a positive impact (i.e. deaths are decreasing).   |
| x3            | allows for change in slope corresponding to the second legislative change. Coded 0 for 1984-2002, 1 for 2003, 2 for 2004, ..., 12 for 2014. If the x3 coefficient is negative, the second legislative change is having a positive impact (i.e. deaths are decreasing). |
| year2         | calendar year; 1 for 1984, 2 for 1985, ..., 30 for 2014                                                                                                                                                                                                                |
| agegp6        | age group; 6 categories                                                                                                                                                                                                                                                |
| ind_combined1 | grouped industry classifications; 10 categories                                                                                                                                                                                                                        |
| denom         | denominator (employed usually resident NZ population estimates)                                                                                                                                                                                                        |

1) Change in slope coefficients, 95%CI and p-value for Post-1:Pre obtained from estimates relating to x2 in the above model. Similarly, Post-2:Post-1 values were obtained from estimates relating to x3

```
xi: poisson num x2 x3 year2 i.agegp6, exp(denom)
```

```
*Pre age-adj APC
```

```
nlcom (exp(_b[year2]) -1)*100
```

```
*Post1 age-adj APC
```

```
nlcom (exp(_b[year2] + _b[x2]) -1)*100
```

```
*Post2 age-adj APC
```

```
nlcom (exp(_b[year2] + _b[x2] + _b[x3]) -1)*100
```

2)

```
xi: poisson num x2 x3 year2 i.agegp6 i.ind_combined1, exp(denom)
```

```
predict predict_n,n
```

```
l year agegp6 ind_combined1 predict_n if year==1985
```

```
collapse (sum) num denom predict_n, by(year)
```

```
gen predict_rate_avg=(predict_n/denom)*100000
```
