# Supplementary material
Source: HighWire-hosted journal article supplement (https://oem.bmj.com/content/79/9/602)
Supplement: inline-supplementary-material-2 [file inline-supplementary-material-2.pdf]

**Supplementary table 1:** Rate of workplace injury deaths in workers by mechanism during three time periods with different legislation (N=2,053)

|                              | Pre: 1985-1992<br>(N=612) |       | Post 1: 1993-2002<br>(N=692) |       | Post 2: 2003-2014<br>(N=749) |       |
|------------------------------|---------------------------|-------|------------------------------|-------|------------------------------|-------|
|                              | n                         | Rate  | n                            | Rate  | n                            | Rate  |
| <b>Mechanism</b>             |                           |       |                              |       |                              |       |
| Chemicals & other substances | 18                        | 1.23  | 16                           | 0.97  | 12                           | 0.61  |
| Falls, trips & slips         | 82                        | 5.62  | 98                           | 5.95  | 103                          | 5.24  |
| Heat, electricity & drowning | 132                       | 9.05  | 126                          | 7.66  | 82                           | 4.18  |
| Hit by moving object         | 203                       | 13.92 | 208                          | 12.64 | 268                          | 13.65 |
| Hitting object with body     | 6                         | 0.41  | 4                            | 0.24  | 12                           | 0.61  |
| Vehicle rollover             | 66                        | 4.53  | 74                           | 4.50  | 111                          | 5.65  |
| Vehicle crash <sup>1</sup>   | 64                        | 4.39  | 114                          | 6.93  | 96                           | 4.89  |
| Weapons                      | 23                        | 1.58  | 34                           | 2.07  | 34                           | 1.73  |
| Multiple & other             | 7                         | 0.48  | 11                           | 0.67  | 26                           | 1.32  |
| Not available                | 11                        | 0.75  | 7                            | 0.43  | 5                            | 0.25  |

Key: Rate per 100,000 worker years, 1 – including quad bikes, air and water craft.
